# Supplementary material for: A mechanistic framework for a priori pharmacokinetic predictions of orally inhaled drugs
Source: PubMed Central journal article supplement (PMC7771877; doi:10.1371/journal.pcbi.1008466), 2020-12-15
Supplement: pcbi.1008466.s003.pdf [file pcbi.1008466.s003.pdf]

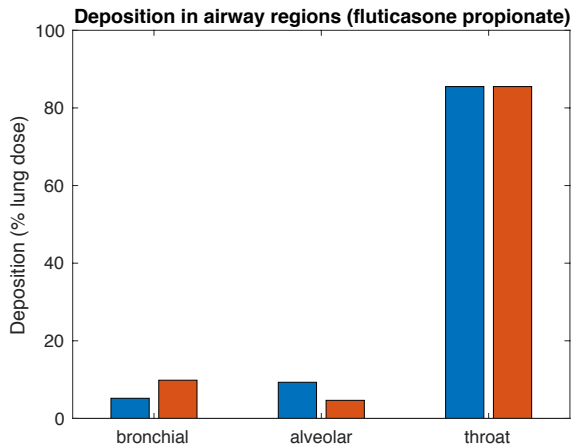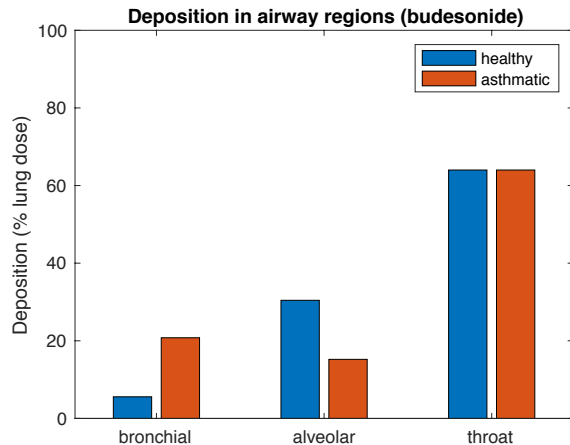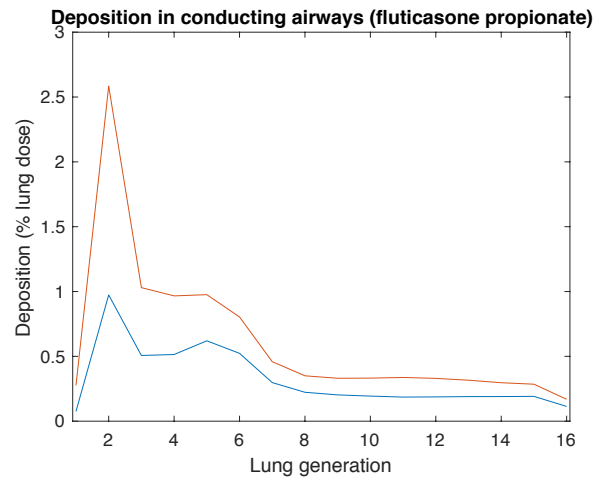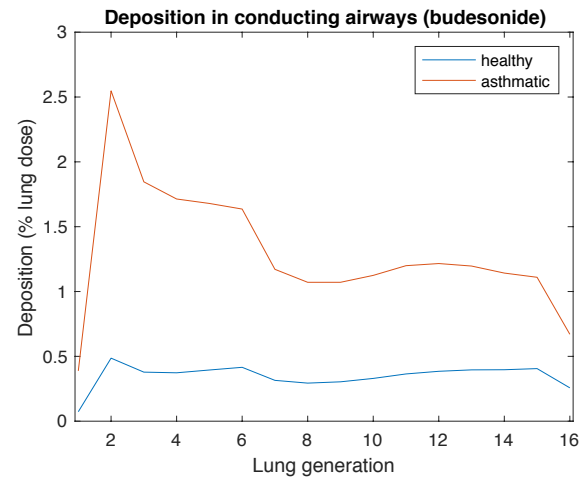

## S2 Fig. Deposition patterns.

Deposition patterns in healthy volunteers and asthmatic patients for fluticasone propionate (Diskus) and budesonide (Turbohaler)
