# Supplementary material for: A mechanistic framework for a priori pharmacokinetic predictions of orally inhaled drugs
Source: PubMed Central journal article supplement (PMC7771877; doi:10.1371/journal.pcbi.1008466), 2020-12-15
Supplement: pcbi.1008466.s004.pdf [file pcbi.1008466.s004.pdf]

# Concentration-time profiles in lung lining fluid

## Fluticasone propionate ( $C_s = 11.98 \mu\text{M}$ )

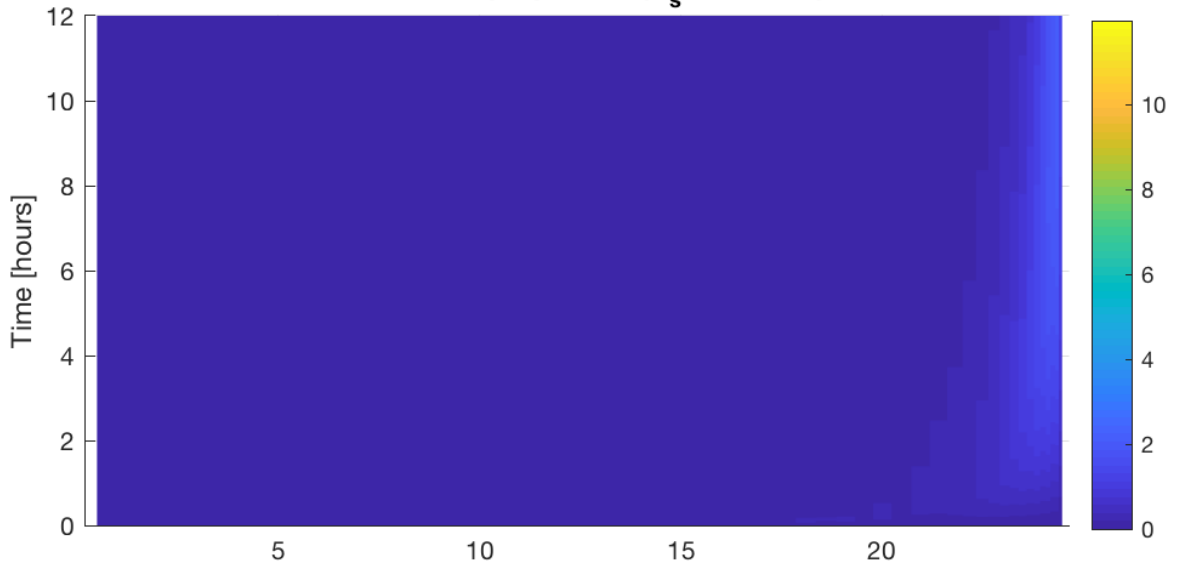

## Budesonide ( $C_s = 69.8 \mu\text{M}$ )

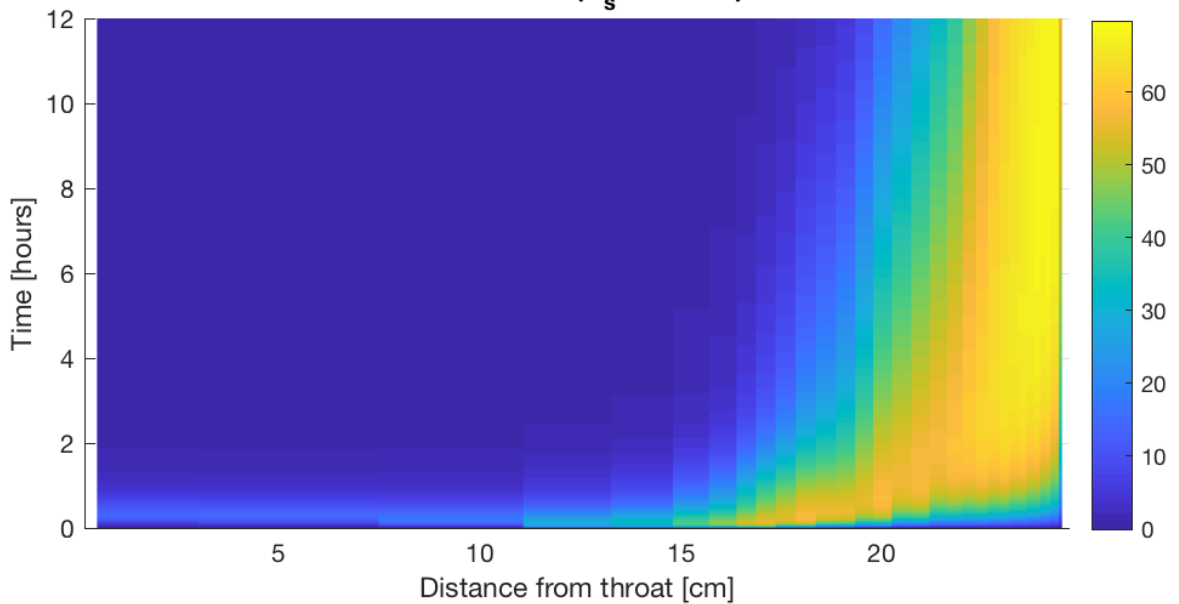

### S3 Fig. Concentration in lung lining fluids.

Predicted time- and generation resolved lung lining fluid concentrations of fluticasone propionate (Diskus, 250  $\mu\text{g}$  dose) and budesonide (Turbohaler, 800  $\mu\text{g}$  dose).
