# Supplementary material for: A mechanistic framework for a priori pharmacokinetic predictions of orally inhaled drugs
Source: PubMed Central journal article supplement (PMC7771877; doi:10.1371/journal.pcbi.1008466), 2020-12-15
Supplement: pcbi.1008466.s005.pdf [file pcbi.1008466.s005.pdf]

### Goodness-of-fit for lung retention data

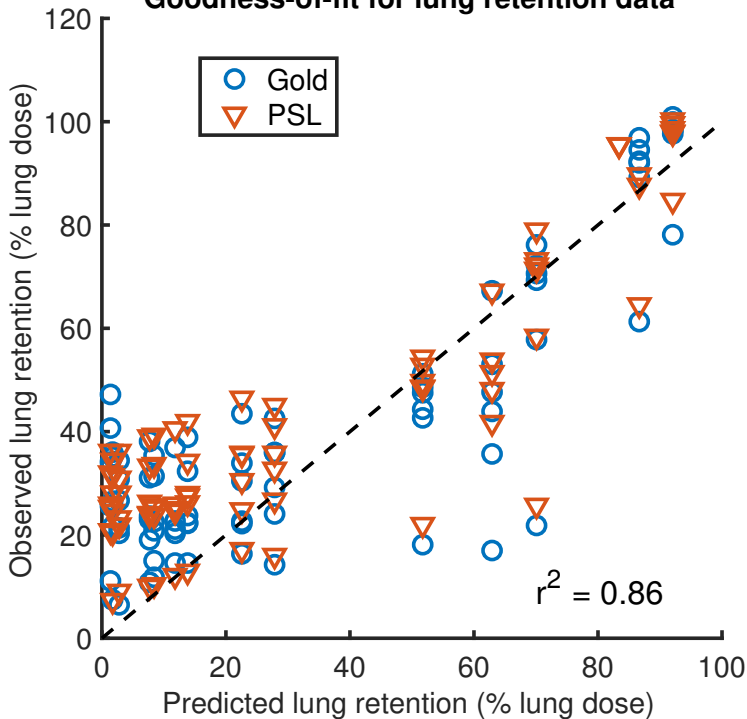

**S4 Fig. Goodness-of-fit for lung retention data.**

Observed vs predicted pulmonary retention of inhaled gold and polystyrene (PSL) particles (see also Fig 3 in the main text).
