# Supplementary material for: A mechanistic framework for a priori pharmacokinetic predictions of orally inhaled drugs
Source: PubMed Central journal article supplement (PMC7771877; doi:10.1371/journal.pcbi.1008466), 2020-12-15
Supplement: pcbi.1008466.s006.pdf [file pcbi.1008466.s006.pdf]

## Goodness-of-fit for pharmacokinetic data in healthy volunteers

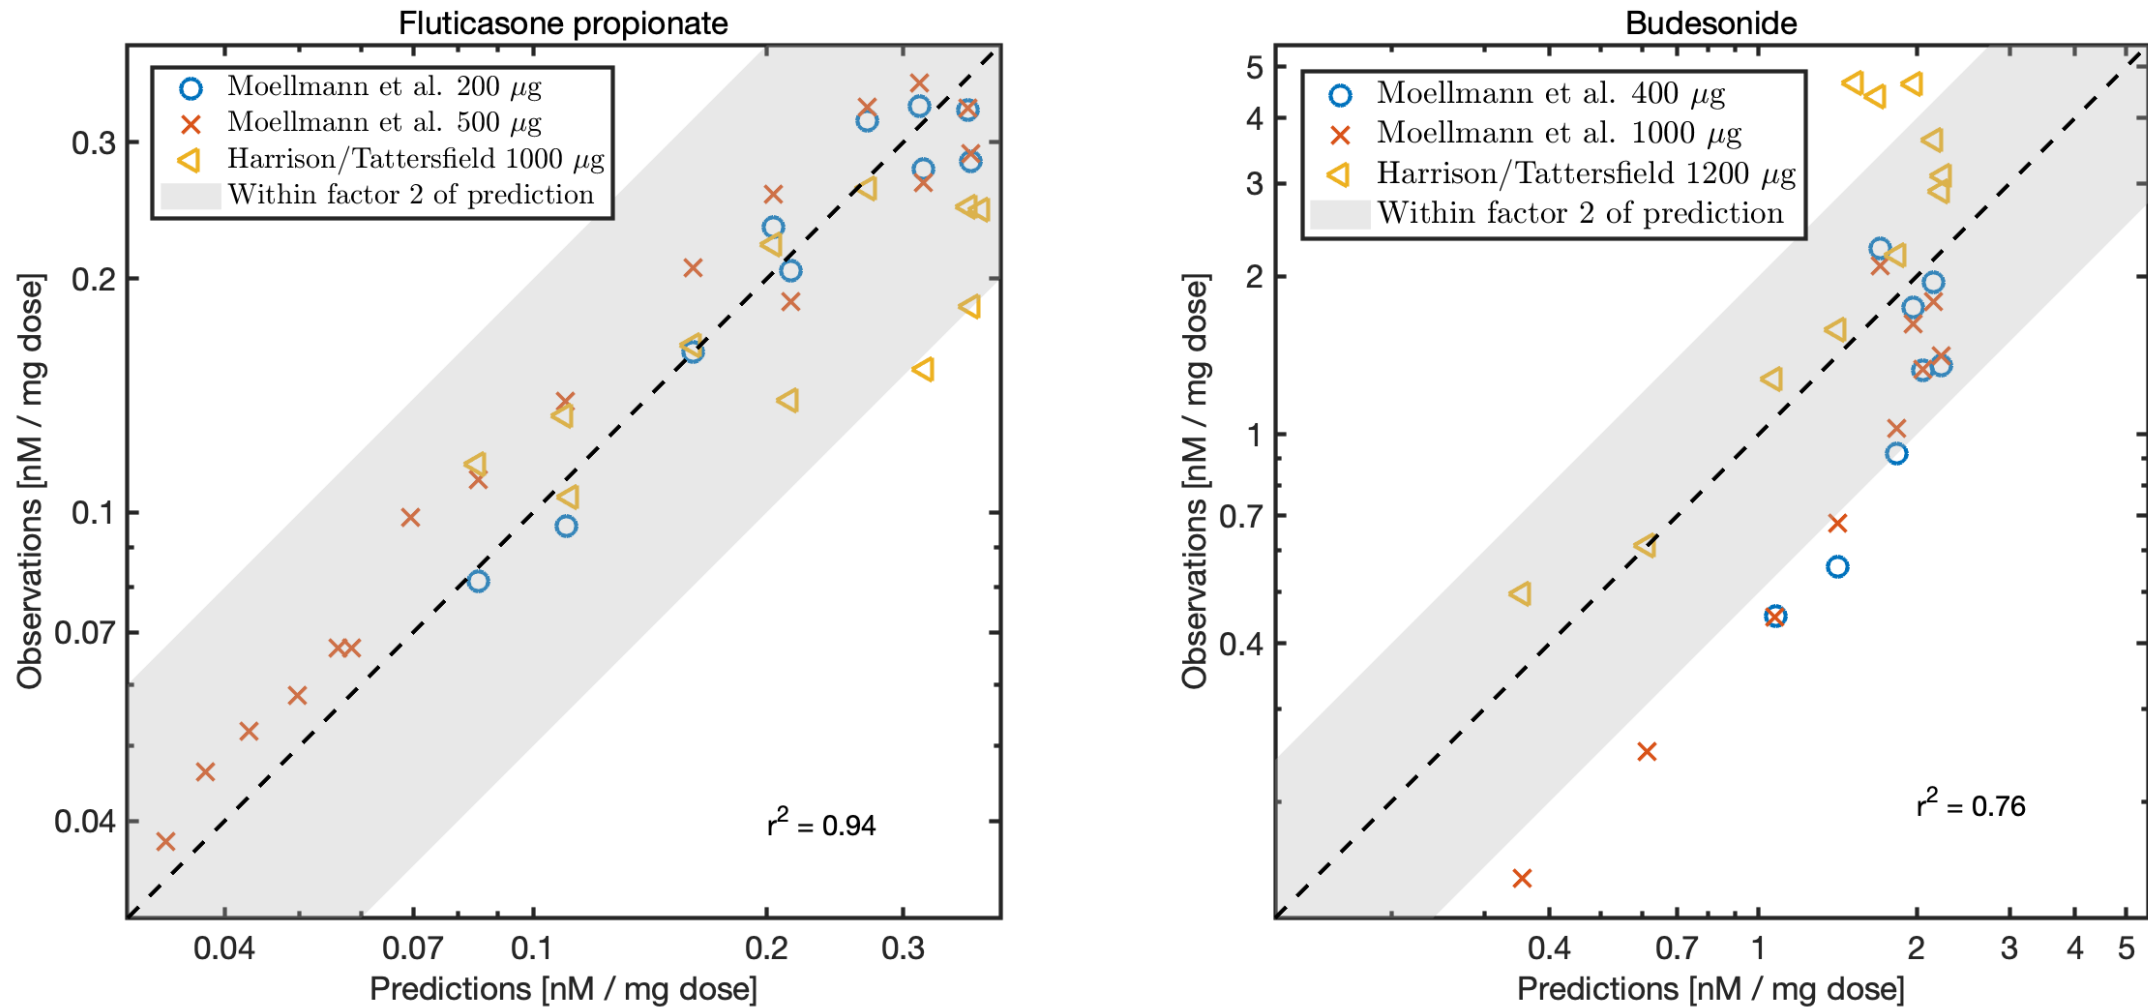

**S5 Fig. Goodness-of-fit for pharmacokinetic data in healthy volunteers.**

Observed vs predicted dose-normalized plasma concentrations of fluticasone propionate (left) and budesonide (right), see also Fig 4 in the main text.
