# Supplementary material for: A mechanistic framework for a priori pharmacokinetic predictions of orally inhaled drugs
Source: PubMed Central journal article supplement (PMC7771877; doi:10.1371/journal.pcbi.1008466), 2020-12-15
Supplement: pcbi.1008466.s007.pdf [file pcbi.1008466.s007.pdf]

## Impact of inhalation volume on insoluble particle retention

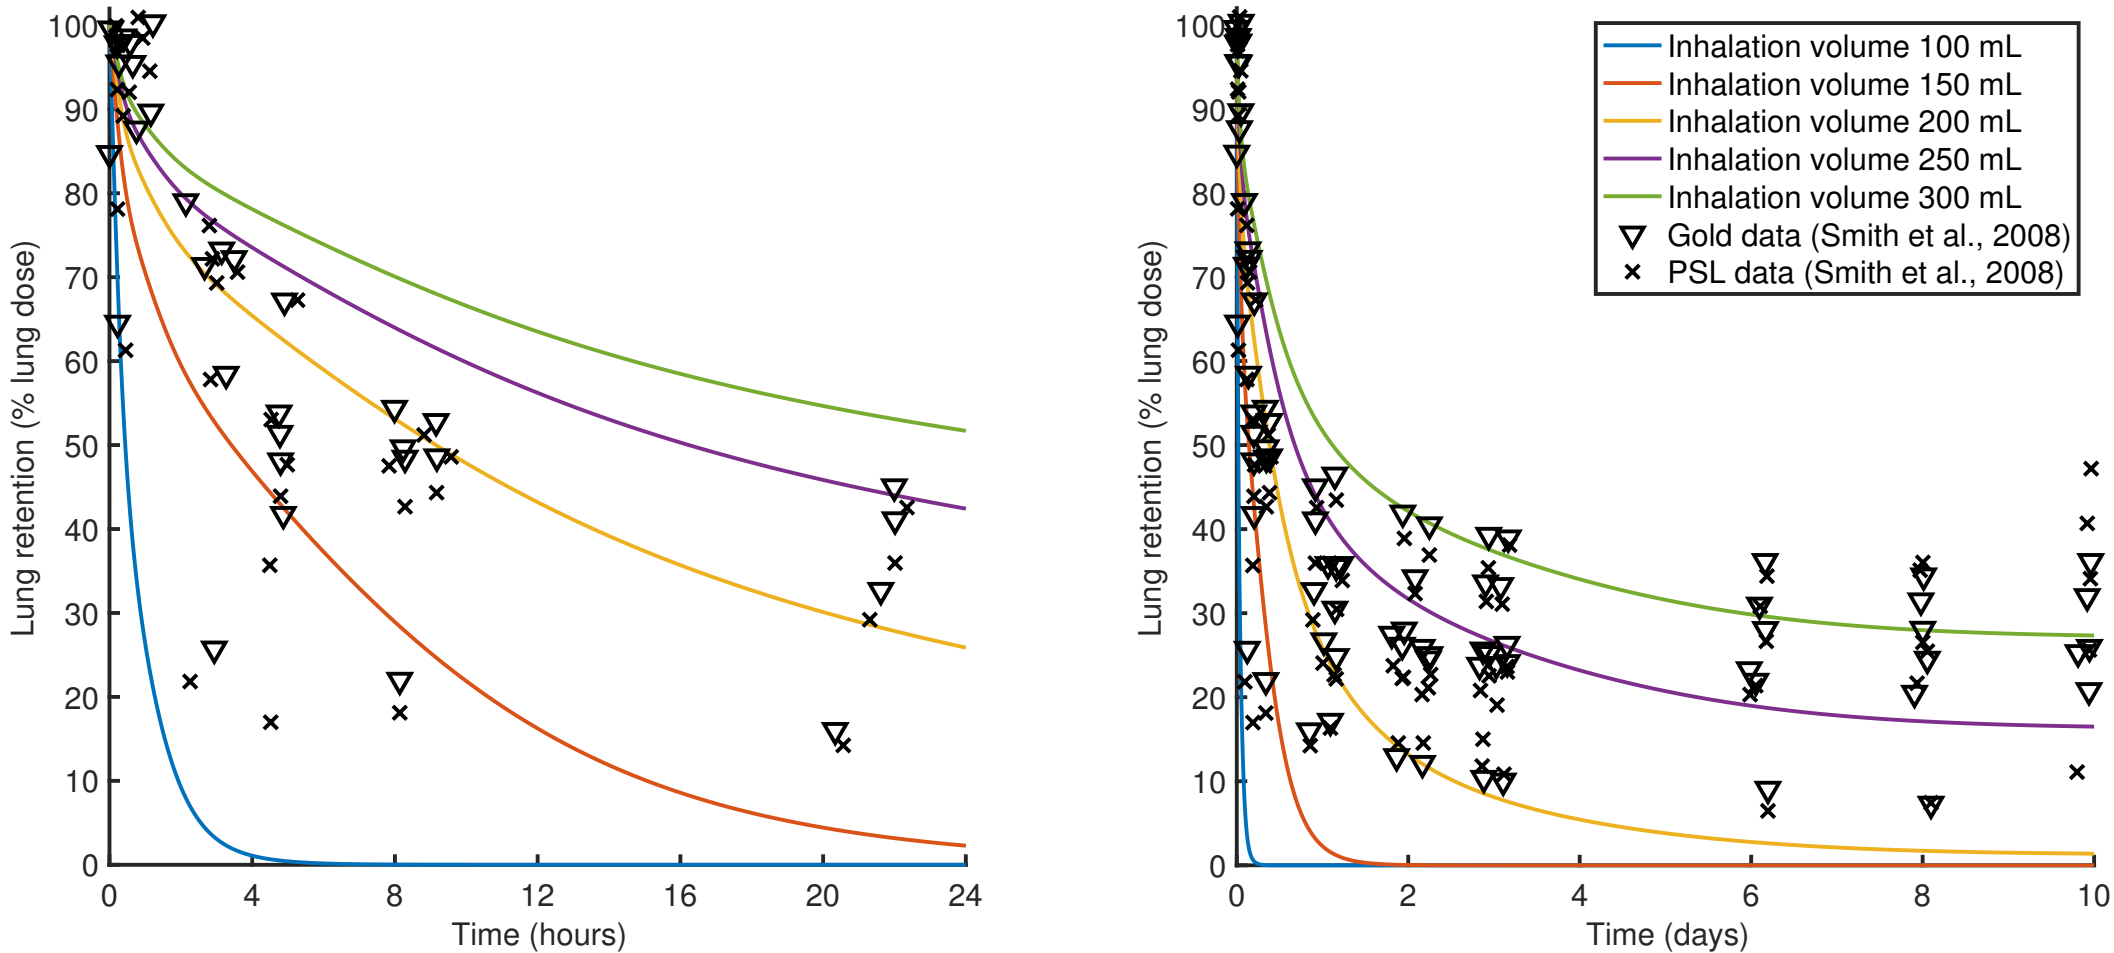

### S6 Fig. Sensitivity analysis – pulmonary retention profiles for varying inhalation volumes of 5 $\mu\text{m}$ particles.

Solid lines: predictions for different “bolus” inhalations ranging from 100–300 mL. Data points: raw data from [1], based on a “bolus depth” of up to 135 mL. Since the bolus enters the mouth-throat at a later stage in the experimental setup by [1] compared to natural tidal breathing which is predicted with the MPPD model, the tidal volume (here “inhalation volume”) is slightly larger than the “bolus depth”, with realistic inhalation volumes of  $\approx 150$ – $200$  mL. A broader range of inhalation volumes is shown to illustrate the large impact of different inhalation characteristics.

### Reference

[1] Smith JR, Bailey MR, Etherington G, Shutt AL, Youngman MJ. Effect of particle size on slow particle clearance from the bronchial tree. *Exp Lung Res.* 2008;34(6):287–312. doi:10.1080/01902140802093196.
